# Supplementary material
Source: Springer Nature journal article supplement (https://edoc.mdc-berlin.de/id/eprint/26467/2/26467suppl.zip)
Supplement: MOESM2 [file 41467_2026_72781_MOESM2_ESM.pdf › 41467_2026_72781_MOESM2_ESM.pdf]

## **Description of Additional Supplementary Files**

**File name: Supplementary Data 1**

Description: scRNA-seq meta data.

**File name: Supplementary Data 2**

Description: Decay rates inferred from bulk SLAM-seq time course.

**File name: Supplementary Data 3**

Description: scRNA-seq and scSLAM-seq sequencing quality statistics.

**File name: Supplementary Data 4**

Description: Upregulated GO terms of injury responsive genes in scSLAM-seq replicate pair 1.

**File name: Supplementary Data 5**

Description: Seurat differential gene expression of scSLAM-seq data.

**File name: Supplementary Data 6**

Description: Upregulated GO terms of injury responsive genes in scSLAM-seq replicate pair 1.

**File name: Supplementary Data 7**

Description: Maker genes of scRNA-seq data.

**File name: Supplementary Data 8**

Description: Upregulated GO terms of cNMF GEPs.

**File name: Supplementary Data 9**

Description: Gene list of pathway layer split.

**File name: Supplementary Data 10**

Description: qPCR Ct values.

**File name: Supplementary Data 11**

Description: Primer sequences.
